# Supplementary material
Source: MDPI journal article supplement (https://www.mdpi.com/1999-4907/13/1/112)
Supplement: s1 [file s1]

# Supplementary Information

## 1. Supplementary Figures and Tables

### 1.1. Supplementary Figure

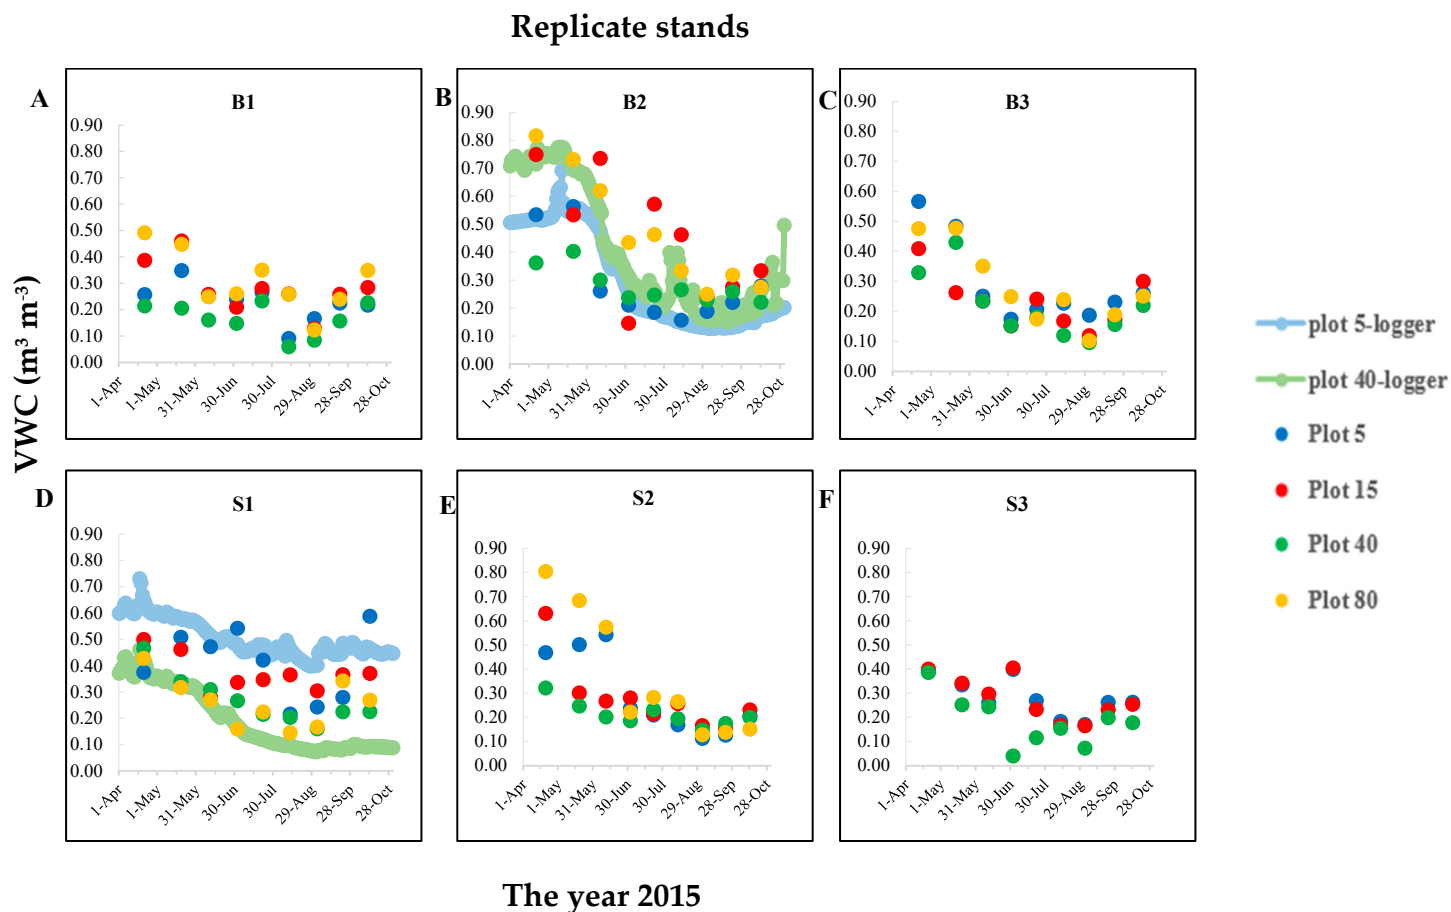

**Figures S1A-F.** Soil volumetric water content (VWC,  $\text{m}^3 \text{m}^{-3}$ ) was recorded monthly in the 5–10 cm layer using a ProCheck reader equipped with a GS3 sensor (Decagon Devices Inc.) at four sampling plots of 5, 15, 40, and 80 (m) of distances from the ditch for replicate stands of birch (B1- B3) and spruce (S1-S3) during April-October 2015. Figure S1 (B and D) also shows the soil VWC measured with reflectometers (model CS615, Campbell Scientific Inc., Logan, UT, USA) collected in 1 min intervals and stored as 10 min averages on a data logger (CR1000, Campbell Scientific Inc., Logan, UT, USA) measured at plot 5 and plot 40 in B2 and S1 in 2015. Reflectometers installed 3-5 cm deeper than ProCheck reader equipped with a GS3 sensor (Decagon Devices Inc.).

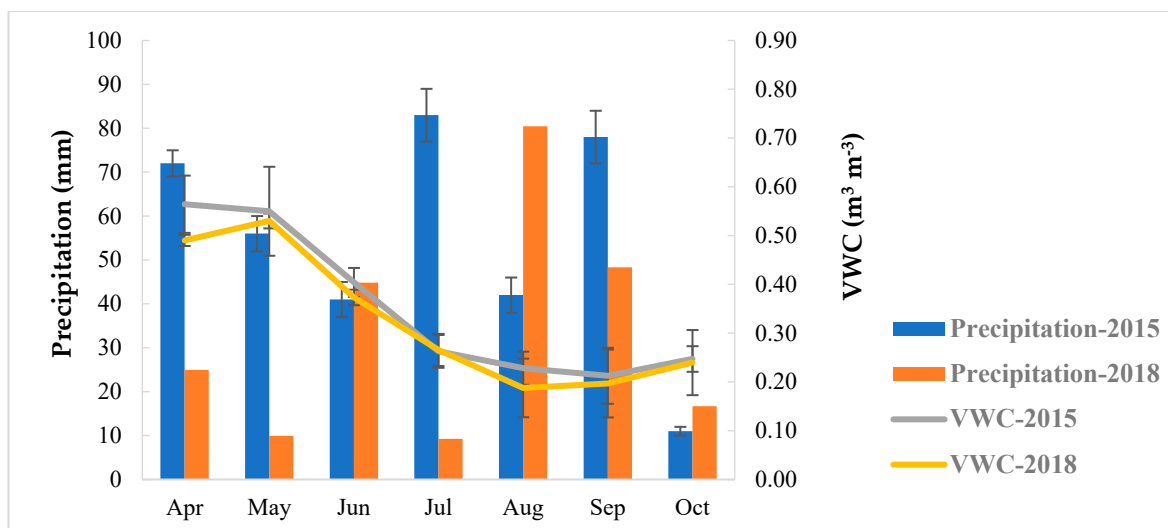

**Figure S2.** The sum of monthly precipitation (mm) was averaged over ten weather stations in South-Estonia for 2015 (means $\pm$ standard errors) and measured at SMEAR station for 2018. Means  $\pm$  standard errors of the soil volumetric water content (VWC,  $\text{m}^3 \text{m}^{-3}$ ) from CR1000 logger data of two sampling plots (5 and 40), and of replicate stands (B2 and S1) from April-October for 2015 and 2018.

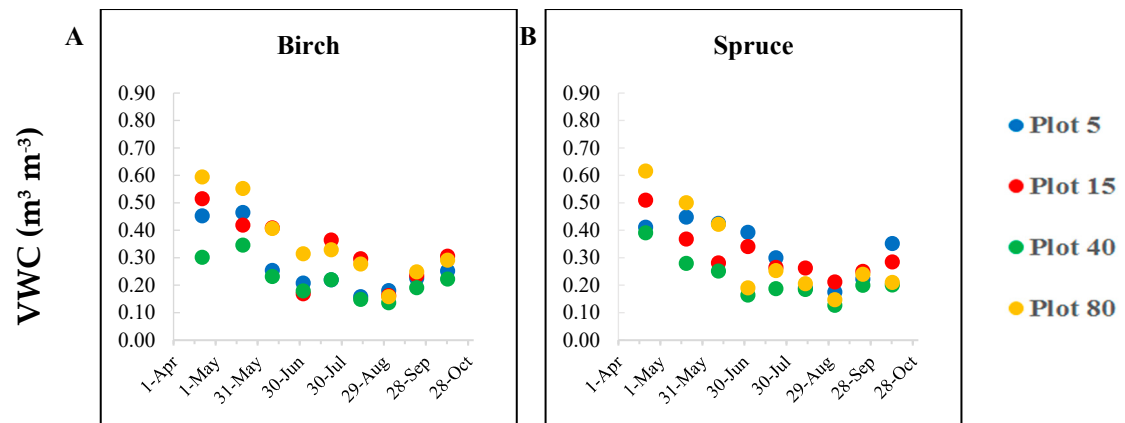

**Figures S3A,B.** Means of soil volumetric water content (VWC,  $\text{m}^3 \text{m}^{-3}$ ) were recorded monthly in the 5-10 cm layer at four sampling plots of 5, 15, 40, and 80 (m) distances from the ditch for birch and spruce averaged over relevant replicate stands during April-October 2015.

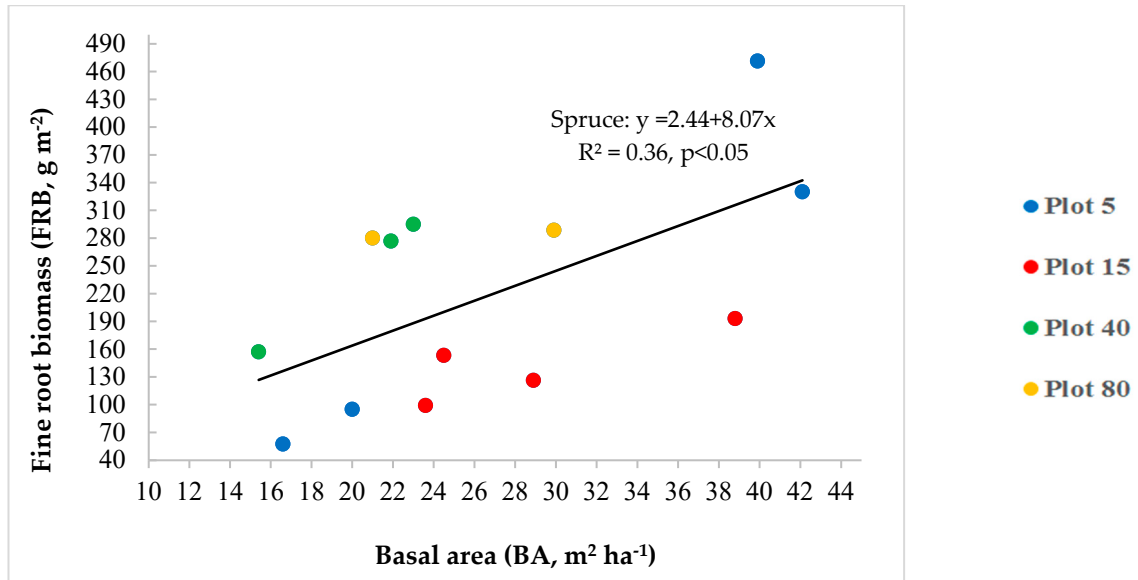

**Figure S4.** Relationship between fine root biomass (FRB, g m<sup>-2</sup>) and stand basal area (BA, m<sup>2</sup> ha<sup>-1</sup>) in four sampling plots of Norway spruce stand.

## 1.2. Supplementary Tables

**Table S1.** Means  $\pm$  standard errors of absorptive root morphological traits per each sampling plot at distances of 5, 15, 40, and 80 m from the ditch in each replicate stand of birch (B1-B3) and spruce (S1-S3) (n=20), and of four sampling plots per each replicate stand. D—diameter (mm), L—length (mm), W—dry weight (mg), BL—branching intensity per length ( $\text{cm}^{-1}$ ), BL<sub>w</sub>—branching intensity per mass ( $\text{mg}^{-1}$ ), SRA—specific root area ( $\text{m}^2 \text{kg}^{-1}$ ), SRL—specific root length ( $\text{m g}^{-1}$ ), and RTD—root tissue density ( $\text{kg m}^{-3}$ ). Small letters indicate a statistically significant difference (one-way ANOVA, followed by Tukey's HSD;  $p < 0.05$ ) of the mean absorptive root morphological traits between four sampling plots in each stand. Capital letters denote a statistically significant difference (one-way ANOVA, followed by Tukey's HSD;  $p < 0.05$ ) of the mean absorptive root morphological traits of four sampling plots among three birch and three spruce stands.

| Root traits                          | Replicate Stand | Distances from the drainage ditch (m) |                                   |                                   |                                   | Means of four sampling plots     |
|--------------------------------------|-----------------|---------------------------------------|-----------------------------------|-----------------------------------|-----------------------------------|----------------------------------|
|                                      |                 | 5                                     | 15                                | 40                                | 80                                |                                  |
| D (mm)                               | B1              | 0.252 $\pm$ 0.004 <sup>ab</sup>       | 0.253 $\pm$ 0.005 <sup>ab</sup>   | 0.216 $\pm$ 0.008 <sup>c</sup>    | 0.236 $\pm$ 0.006 <sup>abc</sup>  | 0.239 $\pm$ 0.009 <sup>A</sup>   |
|                                      | B2              | 0.220 $\pm$ 0.006                     | 0.211 $\pm$ 0.003                 | 0.225 $\pm$ 0.004                 | 0.208 $\pm$ 0.006                 | 0.216 $\pm$ 0.004 <sup>B</sup>   |
|                                      | B3              | 0.210 $\pm$ 0.007 <sup>c</sup>        | 0.228 $\pm$ 0.006 <sup>abc</sup>  | 0.221 $\pm$ 0.006 <sup>abc</sup>  | 0.243 $\pm$ 0.009 <sup>a</sup>    | 0.226 $\pm$ 0.007 <sup>B</sup>   |
|                                      | S1              | 0.295 $\pm$ 0.009 <sup>a</sup>        | 0.273 $\pm$ 0.004 <sup>bc</sup>   | 0.263 $\pm$ 0.002 <sup>bc</sup>   | 0.272 $\pm$ 0.003 <sup>bc</sup>   | 0.276 $\pm$ 0.007                |
|                                      | S2              | 0.279 $\pm$ 0.004 <sup>abc</sup>      | 0.267 $\pm$ 0.004 <sup>bc</sup>   | 0.271 $\pm$ 0.004 <sup>bc</sup>   | 0.289 $\pm$ 0.006 <sup>a</sup>    | 0.277 $\pm$ 0.005                |
|                                      | S3              | 0.269 $\pm$ 0.003 <sup>abc</sup>      | 0.260 $\pm$ 0.003 <sup>c</sup>    | 0.281 $\pm$ 0.007 <sup>a</sup>    |                                   | 0.270 $\pm$ 0.006                |
| L (mm)                               | B1              | 1.39 $\pm$ 0.06                       | 1.42 $\pm$ 0.08                   | 1.38 $\pm$ 0.06                   | 1.38 $\pm$ 0.05                   | 1.39 $\pm$ 0.01 <sup>A</sup>     |
|                                      | B2              | 0.95 $\pm$ 0.05 <sup>abc</sup>        | 1.12 $\pm$ 0.07 <sup>a</sup>      | 0.86 $\pm$ 0.06 <sup>c</sup>      | 0.92 $\pm$ 0.04 <sup>abc</sup>    | 0.96 $\pm$ 0.06 <sup>B</sup>     |
|                                      | B3              | 1.01 $\pm$ 0.04 <sup>bc</sup>         | 1.27 $\pm$ 0.04 <sup>a</sup>      | 0.79 $\pm$ 0.05 <sup>c</sup>      | 1.19 $\pm$ 0.10 <sup>ab</sup>     | 1.07 $\pm$ 0.11 <sup>B</sup>     |
|                                      | S1              | 2.06 $\pm$ 0.11 <sup>a</sup>          | 1.73 $\pm$ 0.05 <sup>c</sup>      | 1.95 $\pm$ 0.09 <sup>abc</sup>    | 1.80 $\pm$ 0.06 <sup>abc</sup>    | 1.89 $\pm$ 0.07                  |
|                                      | S2              | 1.84 $\pm$ 0.06                       | 1.68 $\pm$ 0.06                   | 1.72 $\pm$ 0.07                   | 1.76 $\pm$ 0.05                   | 1.75 $\pm$ 0.03                  |
|                                      | S3              | 1.84 $\pm$ 0.04                       | 1.94 $\pm$ 0.03                   | 1.92 $\pm$ 0.05                   |                                   | 1.90 $\pm$ 0.03                  |
| W (mg)                               | B1              | 0.0194 $\pm$ 0.0008                   | 0.0190 $\pm$ 0.0013               | 0.0154 $\pm$ 0.0013               | 0.0162 $\pm$ 0.0012               | 0.0175 $\pm$ 0.0010 <sup>A</sup> |
|                                      | B2              | 0.0088 $\pm$ 0.0007                   | 0.0100 $\pm$ 0.0006               | 0.0088 $\pm$ 0.0010               | 0.0072 $\pm$ 0.0006               | 0.0087 $\pm$ 0.0006 <sup>C</sup> |
|                                      | B3              | 0.0089 $\pm$ 0.0004 <sup>c</sup>      | 0.0134 $\pm$ 0.0008 <sup>a</sup>  | 0.0074 $\pm$ 0.0007 <sup>c</sup>  | 0.0135 $\pm$ 0.0018 <sup>a</sup>  | 0.0108 $\pm$ 0.0016 <sup>B</sup> |
|                                      | S1              | 0.0397 $\pm$ 0.0025 <sup>a</sup>      | 0.0291 $\pm$ 0.0011 <sup>bc</sup> | 0.0316 $\pm$ 0.0016 <sup>bc</sup> | 0.0289 $\pm$ 0.0014 <sup>bc</sup> | 0.0323 $\pm$ 0.0025              |
|                                      | S2              | 0.0315 $\pm$ 0.0010                   | 0.0273 $\pm$ 0.0011               | 0.0293 $\pm$ 0.0014               | 0.0321 $\pm$ 0.0017               | 0.0301 $\pm$ 0.0011              |
|                                      | S3              | 0.0321 $\pm$ 0.0011                   | 0.0319 $\pm$ 0.0009               | 0.0362 $\pm$ 0.0011               |                                   | 0.0334 $\pm$ 0.0014              |
| BL ( $\text{cm}^{-1}$ )              | B1              | 7.45 $\pm$ 0.34                       | 7.53 $\pm$ 0.46                   | 7.49 $\pm$ 0.32                   | 7.37 $\pm$ 0.24                   | 7.46 $\pm$ 0.03 <sup>B</sup>     |
|                                      | B2              | 11.11 $\pm$ 0.59 <sup>abc</sup>       | 9.76 $\pm$ 0.77 <sup>c</sup>      | 12.76 $\pm$ 0.87 <sup>a</sup>     | 11.34 $\pm$ 0.54 <sup>abc</sup>   | 11.24 $\pm$ 0.61 <sup>A</sup>    |
|                                      | B3              | 10.17 $\pm$ 0.40 <sup>bc</sup>        | 8.07 $\pm$ 0.29 <sup>bc</sup>     | 13.52 $\pm$ 0.74 <sup>a</sup>     | 9.50 $\pm$ 0.75 <sup>bc</sup>     | 10.32 $\pm$ 1.15 <sup>A</sup>    |
|                                      | S1              | 5.09 $\pm$ 0.24                       | 5.88 $\pm$ 0.19                   | 5.32 $\pm$ 0.23                   | 5.70 $\pm$ 0.22                   | 5.50 $\pm$ 0.18                  |
|                                      | S2              | 5.55 $\pm$ 0.17                       | 6.10 $\pm$ 0.23                   | 5.99 $\pm$ 0.25                   | 5.76 $\pm$ 0.17                   | 5.85 $\pm$ 0.12                  |
|                                      | S3              | 5.56 $\pm$ 0.14                       | 5.20 $\pm$ 0.09                   | 5.28 $\pm$ 0.15                   |                                   | 5.35 $\pm$ 0.11                  |
| BL <sub>w</sub> ( $\text{mg}^{-1}$ ) | B1              | 53.5 $\pm$ 2.3 <sup>bc</sup>          | 57.4 $\pm$ 4.1 <sup>bc</sup>      | 74.3 $\pm$ 6.0 <sup>a</sup>       | 67.7 $\pm$ 4.7 <sup>abc</sup>     | 63.2 $\pm$ 4.8 <sup>C</sup>      |
|                                      | B2              | 125.9 $\pm$ 9.0 <sup>abc</sup>        | 110.4 $\pm$ 8.9 <sup>c</sup>      | 132.4 $\pm$ 10.2 <sup>abc</sup>   | 157.9 $\pm$ 13.7 <sup>a</sup>     | 131.7 $\pm$ 9.9 <sup>A</sup>     |
|                                      | B3              | 117.6 $\pm$ 6.9 <sup>b</sup>          | 78.7 $\pm$ 3.8 <sup>c</sup>       | 157.5 $\pm$ 13.1 <sup>a</sup>     | 93.2 $\pm$ 8.8 <sup>bc</sup>      | 111.8 $\pm$ 17.2 <sup>B</sup>    |
|                                      | S1              | 26.8 $\pm$ 1.4 <sup>c</sup>           | 35.4 $\pm$ 1.5 <sup>ab</sup>      | 33.2 $\pm$ 1.6 <sup>ab</sup>      | 36.1 $\pm$ 1.7 <sup>ab</sup>      | 32.9 $\pm$ 2.1                   |

|                                        |    |                       |                         |                       |                     |                    |
|----------------------------------------|----|-----------------------|-------------------------|-----------------------|---------------------|--------------------|
|                                        | S2 | 32.3±1.0              | 37.6±1.4                | 36.1±2.2              | 33.0±1.8            | 34.8±1.3           |
|                                        | S3 | 32.6±1.2 <sup>a</sup> | 32.2±0.8 <sup>abc</sup> | 28.1±0.9 <sup>c</sup> |                     | 31.0±1.4           |
| SRA (m <sup>2</sup> kg <sup>-1</sup> ) | B1 | 57±1 <sup>c</sup>     | 60±1 <sup>abc</sup>     | 64±2 <sup>ab</sup>    | 66±2 <sup>ab</sup>  | 62±2 <sup>C</sup>  |
|                                        | B2 | 76±2 <sup>bc</sup>    | 75±1 <sup>bc</sup>      | 72±2 <sup>bc</sup>    | 87±3 <sup>a</sup>   | 78±3 <sup>A</sup>  |
|                                        | B3 | 75±2                  | 69±2                    | 77±2                  | 72±2                | 73±2 <sup>B</sup>  |
|                                        | S1 | 49±2 <sup>c</sup>     | 52±1 <sup>abc</sup>     | 51±1 <sup>abc</sup>   | 54±1 <sup>a</sup>   | 52±1               |
|                                        | S2 | 51±1                  | 52±1                    | 51±1                  | 51±1                | 51±0               |
|                                        | S3 | 49±1 <sup>abc</sup>   | 50±1 <sup>a</sup>       | 47±1 <sup>c</sup>     |                     | 49±1               |
| SRL (m g <sup>-1</sup> )               | B1 | 73±2 <sup>c</sup>     | 76±3 <sup>bc</sup>      | 99±7 <sup>a</sup>     | 91±5 <sup>ab</sup>  | 85±6 <sup>C</sup>  |
|                                        | B2 | 112±4 <sup>bc</sup>   | 113±3 <sup>bc</sup>     | 103±4 <sup>bc</sup>   | 136±7 <sup>a</sup>  | 116±7 <sup>A</sup> |
|                                        | B3 | 116±4 <sup>a</sup>    | 97±3 <sup>c</sup>       | 114±5 <sup>abc</sup>  | 98±6 <sup>abc</sup> | 106±5 <sup>B</sup> |
|                                        | S1 | 54±3 <sup>c</sup>     | 60±2 <sup>abc</sup>     | 62±1 <sup>ab</sup>    | 63±1 <sup>ab</sup>  | 60±2               |
|                                        | S2 | 58±1                  | 62±1                    | 60±2                  | 57±2                | 59±1               |
|                                        | S3 | 58±1 <sup>abc</sup>   | 62±1 <sup>a</sup>       | 54±2 <sup>c</sup>     |                     | 58±2               |
| RTD (kg m <sup>-3</sup> )              | B1 | 281±5 <sup>abc</sup>  | 269±8 <sup>bc</sup>     | 297±7 <sup>a</sup>    | 262±5 <sup>bc</sup> | 277±8 <sup>A</sup> |
|                                        | B2 | 243±9                 | 255±6                   | 253±8                 | 227±8               | 245±6 <sup>B</sup> |
|                                        | B3 | 263±11                | 262±11                  | 242±10                | 236±5               | 251±7 <sup>B</sup> |
|                                        | S1 | 285±7                 | 286±6                   | 299±5                 | 276±8               | 287±5 <sup>B</sup> |
|                                        | S2 | 284±5 <sup>abc</sup>  | 291±5 <sup>abc</sup>    | 293±5 <sup>a</sup>    | 275±4 <sup>c</sup>  | 286±4 <sup>B</sup> |
|                                        | S3 | 305±3                 | 310±5                   | 308±6                 |                     | 308±2 <sup>A</sup> |

**Table S2.** Pearson's correlation analyses between soil parameters of the forest stands for birch and spruce. The correlation coefficient (r) is presented and statistical significance (p value) is shown as p<0.05 \*, p<0.01 \*\*, and p<0.001 \*\*\*. Ns. indicates statistically non-significant correlations.

| Soil parameters     | Tree species | Peat depth | pH-H <sub>2</sub> O | Ca       | C/N       |
|---------------------|--------------|------------|---------------------|----------|-----------|
| Peat depth          | Birch        | -          | 0.87 ***            | 0.87 *** | Ns.       |
|                     | Spruce       | -          | - 0.70 **           | Ns.      | 0.57 *    |
| pH-H <sub>2</sub> O | Birch        | 0.87 ***   | -                   | 0.64 *   | Ns.       |
|                     | Spruce       | - 0.70 **  | -                   | 0.69 **  | - 0.77 ** |
| Ca                  | Birch        | 0.87 ***   | 0.64 *              | -        | Ns.       |
|                     | Spruce       | Ns.        | 0.69 **             | -        | - 0.56 *  |
| C/N                 | Birch        | Ns.        | Ns.                 | Ns.      | -         |
|                     | Spruce       | 0.57 *     | - 0.77 **           | - 0.56 * | -         |

**Table S3.** Effect of the forest stand, and distance from the ditch (m) on absorptive root morphological traits in birch and spruce, analyzed by type III general linear model (GLM). L- Length (mm), BIL- branching intensity per length (cm<sup>-1</sup>), and RTD- root tissue density (kg m<sup>-3</sup>). The statistical significance (p value) is presented for significant effects as p<0.05. Ns. indicates statistically non-significant effects.

| Variables                   | Tree species | L (mm)   |          | BIL (cm <sup>-1</sup> ) |          | RTD (kg m <sup>-3</sup> ) |          |
|-----------------------------|--------------|----------|----------|-------------------------|----------|---------------------------|----------|
|                             |              | <i>F</i> | <i>P</i> | <i>F</i>                | <i>P</i> | <i>F</i>                  | <i>P</i> |
| Forest stand                | Birch        | 10.04    | <0.05    | 10.06                   | <0.05    | 25.66                     | <0.05    |
|                             | Spruce       | -        | Ns.      | -                       | Ns.      | -                         | Ns.      |
| Distance from the ditch (m) | Birch        | -        | Ns.      | -                       | Ns.      | 9.43                      | <0.05    |
|                             | Spruce       | -        | Ns.      | -                       | Ns.      | -                         | Ns.      |
